# Supplementary material for: Cryo-EM structure of aerolysin variants reveals a novel protein fold and the pore-formation process
Source: PubMed Central journal article supplement (PMC4947156; doi:10.1038/ncomms12062), 2016-07-13
Supplement: ncomms12062-s1.pdf [file ncomms12062-s1.pdf]

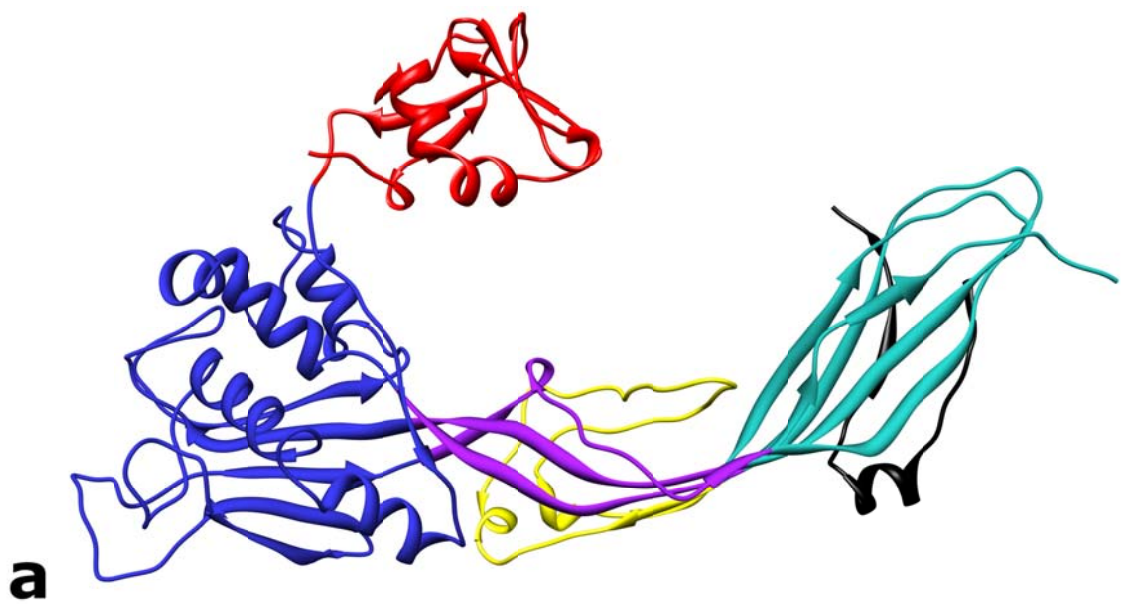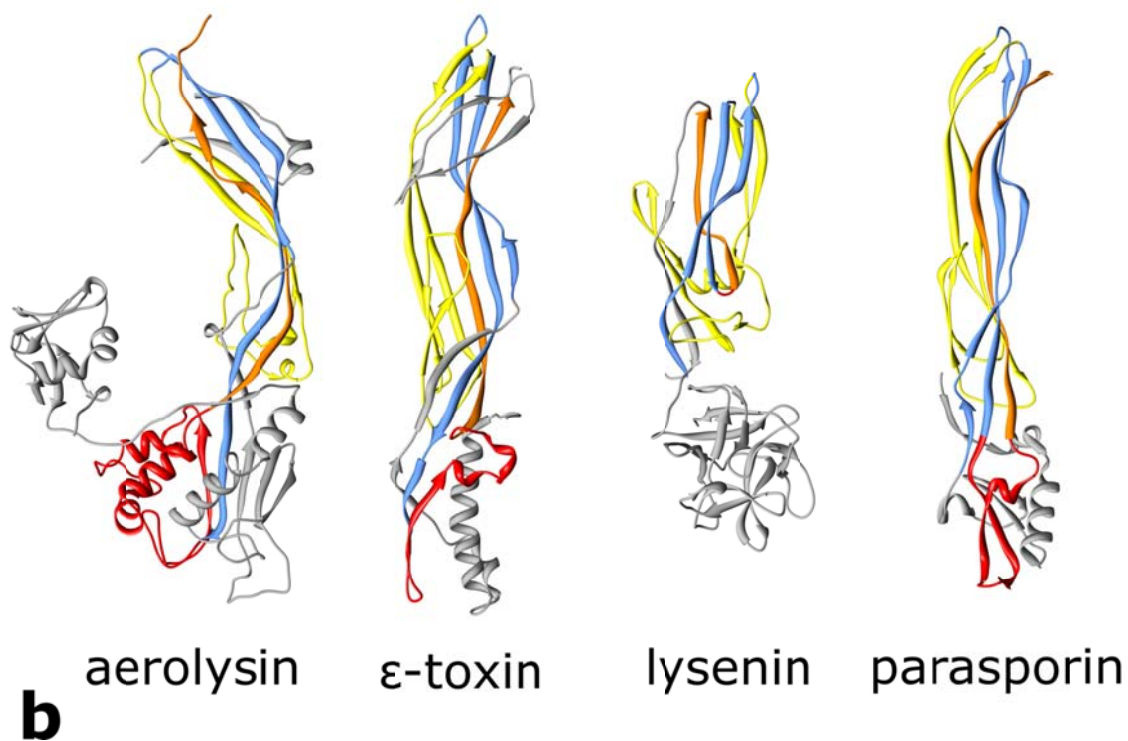

**Supplementary Figure 1: soluble form structure of aerolysin family members**

**a.** Structure of the soluble form of proaerolysin (PDB 1PRE) divided in structural domains. Domain 1 in red, domain 2 in blue, domain 3 in purple, domain 4 in turquoise. The prestem loop is shown in yellow whilst the C-terminal activation peptide (CTP) is shown in black. **b.** Aerolysin and aerolysin family members colour coded to highlight a common structural motif adopted from Szczesny et. al<sup>1</sup>. The extended aerolysin family is characterised by a common structural motif which can be divided into a variable loop usually containing the binding side (red), two highly conserved  $\beta$ -strands (blue), an insertion loop (yellow) and weakly conserved  $\beta$ -strand (orange).

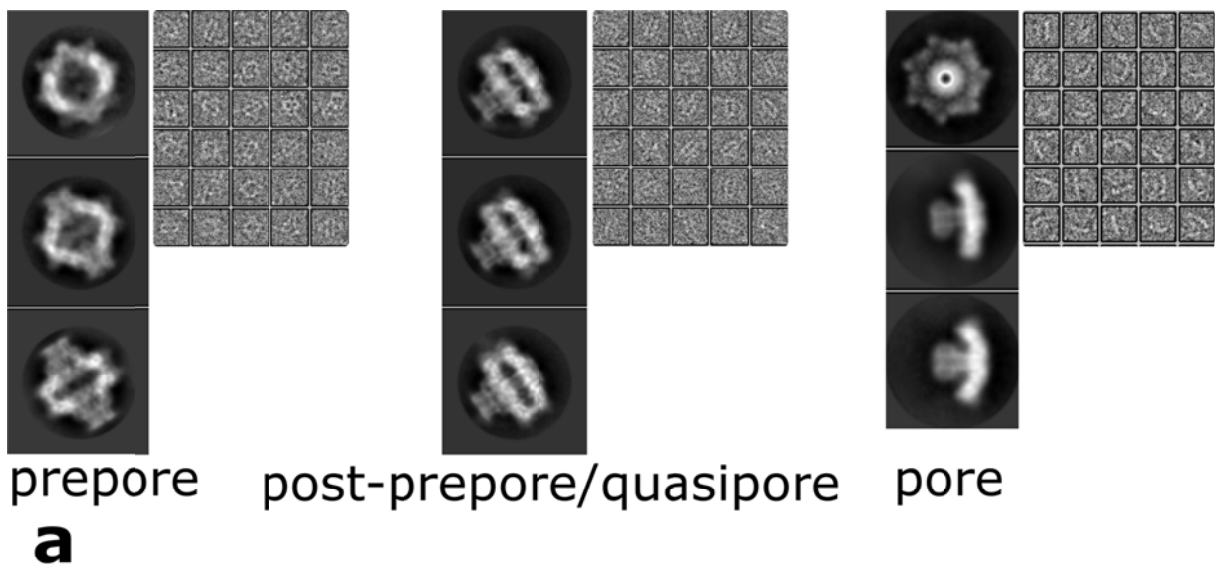

**b**

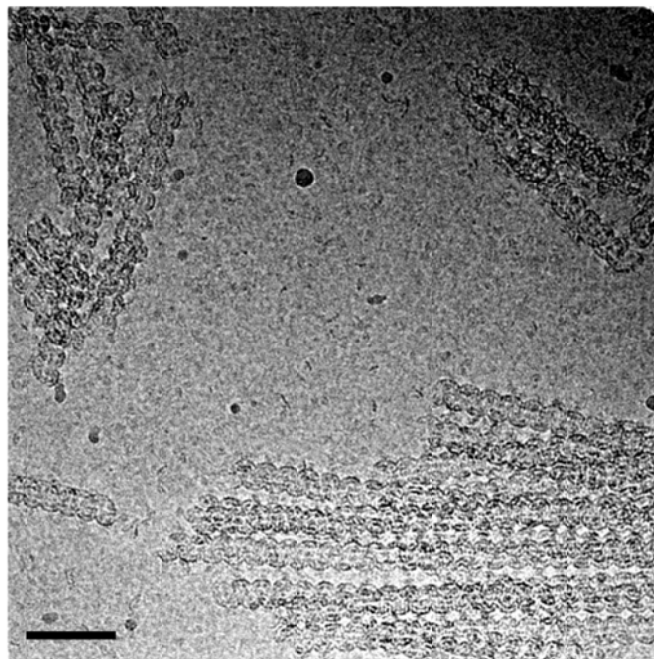

**Supplementary Figure 2: Particles, class averages, and micrograph**

**a.** Class averages and “shiny” particles from the prepore, postprepore/quasipore and pore (in LMNG micelles) datasets. Box size for prepore and postprepore/quasipore is 268 Å and 252 Å for the pore. **b.** Wild type aerolysin shows some aggregation even in the presence of detergent (scale bar: 100nm).

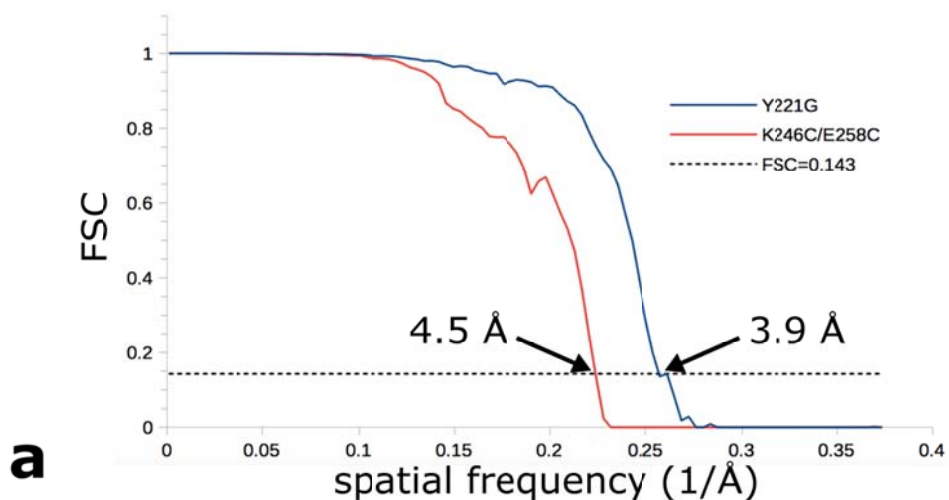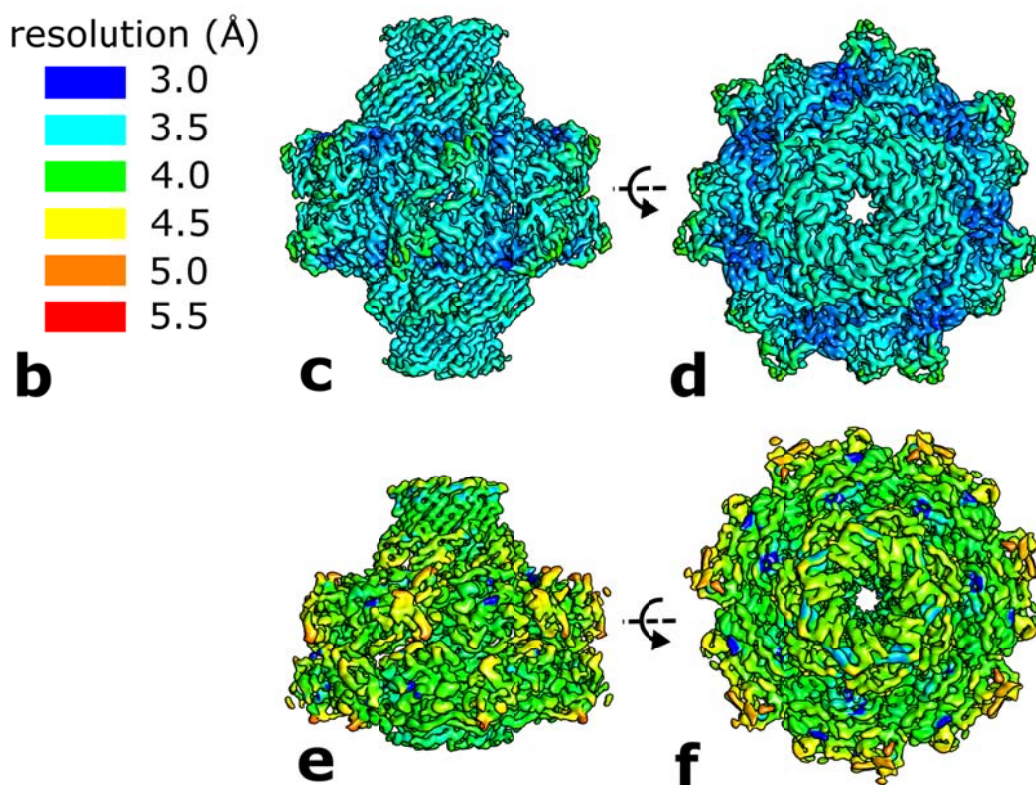

### Supplementary Figure 3: Cryo-EM maps resolution estimation

Cryo-EM maps resolution estimation. **a**, Masking-effect-corrected gold standard FSC curves of the prepore (blue) and post- and quasipore (red) maps. The horizontal dashed line indicates the 0.143 cutoff used to estimate the global resolution of the two maps at 3.9 Å and 4.5 Å, respectively. **b**, gradient colour scale used for local resolution representation. **cd**, Side and top views of the prepore cryo-EM map colour-coded according to local resolution as in **b**. **ef**, Side and top views of the post-prepore and quasipore cryo-EM map colour coded as in **b**. **g**, Gold standard FSC curves for the wild-type aerolysin pore in detergent.



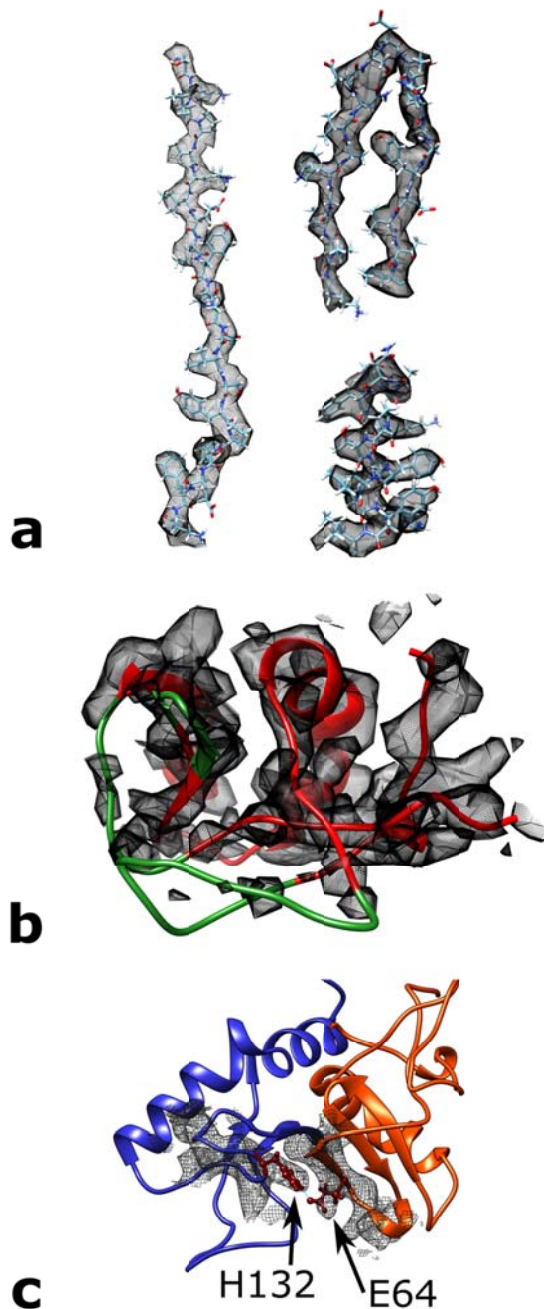

#### Supplementary Figure 4: Cryo-EM map resolution highlights

Cryo-EM map resolution highlights. **a**, Local level of detail in the prepore cryo-EM map showing residues 289 to 309 belonging to domains 3 and 4 (left), 198 to 219 belonging to domain 4 (top right) and 108 to 123 belonging to domain 2 (bottom right) as sticks with the corresponding density shown in mesh representation. Bulky side chain densities are clearly resolved in the cryo-EM map. **b**, Structure of the domain 1 (in red) docked in the corresponding density(mesh). The receptor binding loops (in green) are flexible and unresolved (L11-K22, L50-W54 and G68-N72). **c**, Inter-subunit hydrogen bond H132-E64. Part of one subunit ribbon diagram is drawn in blue and part of the next subunit is in red. A portion of the prepore feature-enhanced map around H132 and E64 is displayed in mesh.

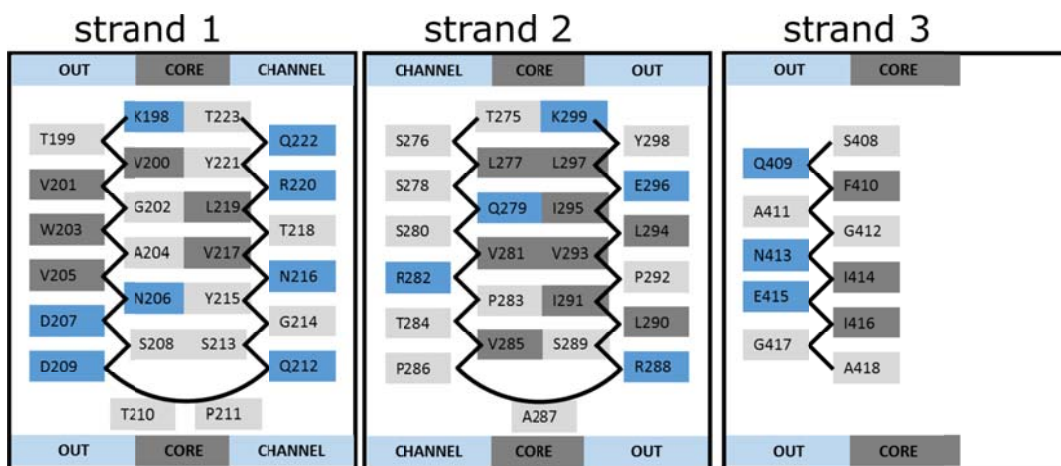

**a**

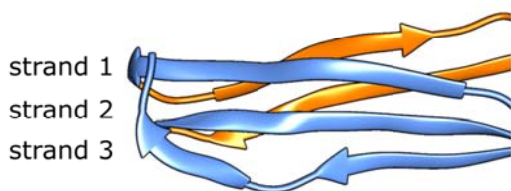

**b**

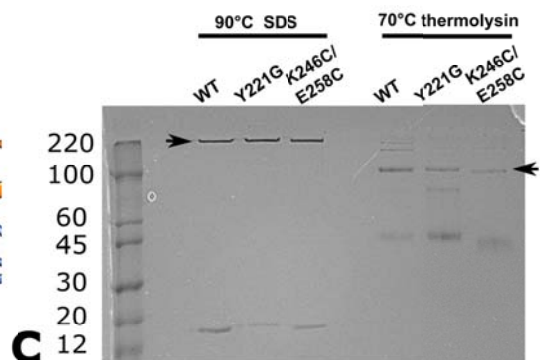

**c**

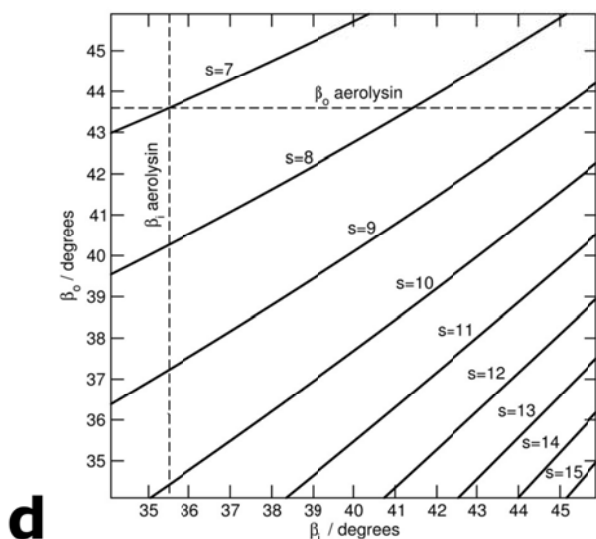

**d**

### Supplementary Figure 5: Concentric $\beta$ -barrel fold responsible for the stability and stoichiometry of the aerolysin oligomer

Concentric  $\beta$ -barrel fold responsible for the stability and stoichiometry of the aerolysin oligomer. **a**, Schematics of the residues involved in the formation of the concentric  $\beta$ -barrel fold. Hydrophobic residues are shown in dark grey, uncharged/indifferent residues in light grey whilst charged residues are in light blue. **b**, structure of one subunit of the  $\beta$ -barrel fold showing the position of the 3 strands referred to in **a**. **c**, SDS-PAGE of aerolysin wild-type (lanes 1 and 4), Y221G (lanes 2 and 5) and K246C/E258C (lanes 3 and 6) oligomers. Following proteolytic activation and oligomerisation, the sample was heated to 90° in presence of sample buffer (including 2% SDS) for 5 minutes and loaded on the gel (lanes 1-3). Most of the

oligomeric proteins are not denatured (left arrow). Oligomeric aerolysin was incubated at 70 °C in the presence of thermolysin for 10 minutes followed by addition of sample buffer and loading on the gel (lanes 6-8). These lanes show a similar band pattern to those published in<sup>2</sup>, indicating that most of the proteins are only partially digested heptamers (right arrow). **d**, The outer  $\beta$ -barrel chain tilt angle is displayed as function of the inner  $\beta$ -barrel chain tilt angle for a range of aerolysin stoichiometry ( $s$ ) according to equation 1 (see Methods). The measured values for aerolysin inner and outer  $\beta$ -barrel chain tilt angles are displayed with dashed lines. Only the acceptable range of chain tilt angles as defined in Methods is represented (35 to 45°). This analysis shows that the smallest possible aerolysin-like protein oligomer is a heptamer.

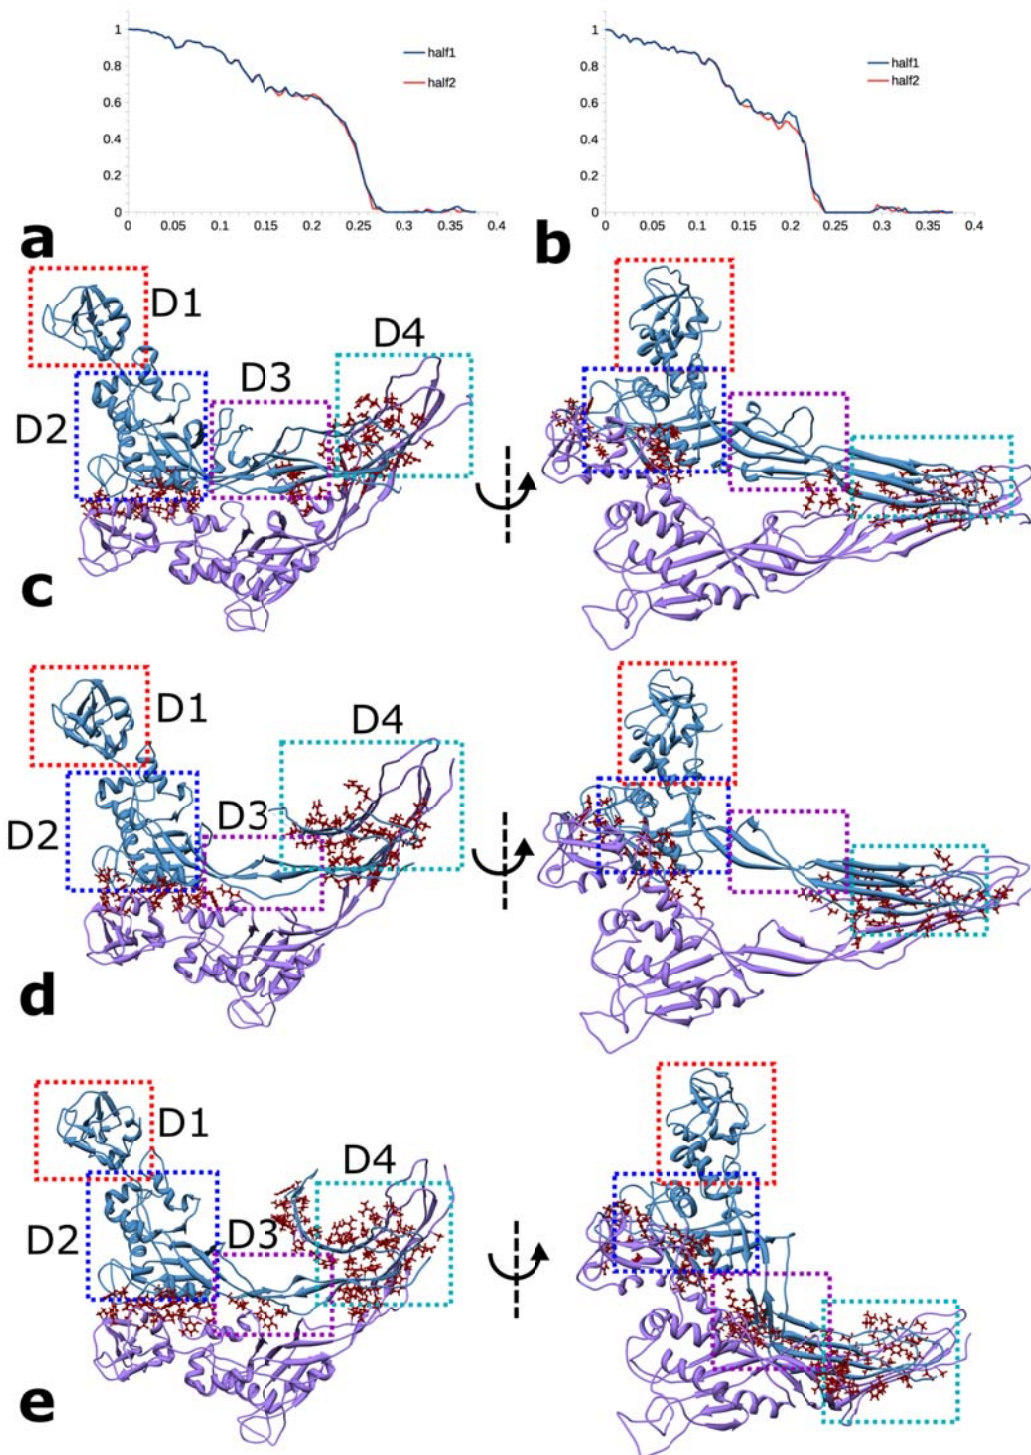

### Supplementary Figure 6: Model quality assessment and inter-subunit contacts

Model quality assessment and inter-subunit contacts. **a**, FSC curves of the prepore model versus the Y221G mutant training half map (blue) and test half map (red). **b**, FSC curves of the post-prepore and quasipore models versus the K246C/E258C mutant training half map (blue) and test half map (red). **c**, Structure of two consecutive subunits of the prepore coloured in blue and purple, respectively. Residues calculated as inter-subunit contacts are shown in red as ball and stick representation. Dashed rectangles show the position of individual domains and are colour coded as in Fig. 1. **d**, Structure of two consecutive subunits of the post-prepore

as in **c**. Of note, the contact site between the two domains 4 is enlarged whilst the prestem loop gets unstructured. **e**, Structure of two consecutive subunits of the quasipore as in **a** highlighting the extensive contacts formed between subunits. In particular the  $\beta$ -barrel elongation provides additional contacts whilst the collapse of the structure generates new contacts between domain 2 of the purple subunit and domain 3 of the following subunit (blue).



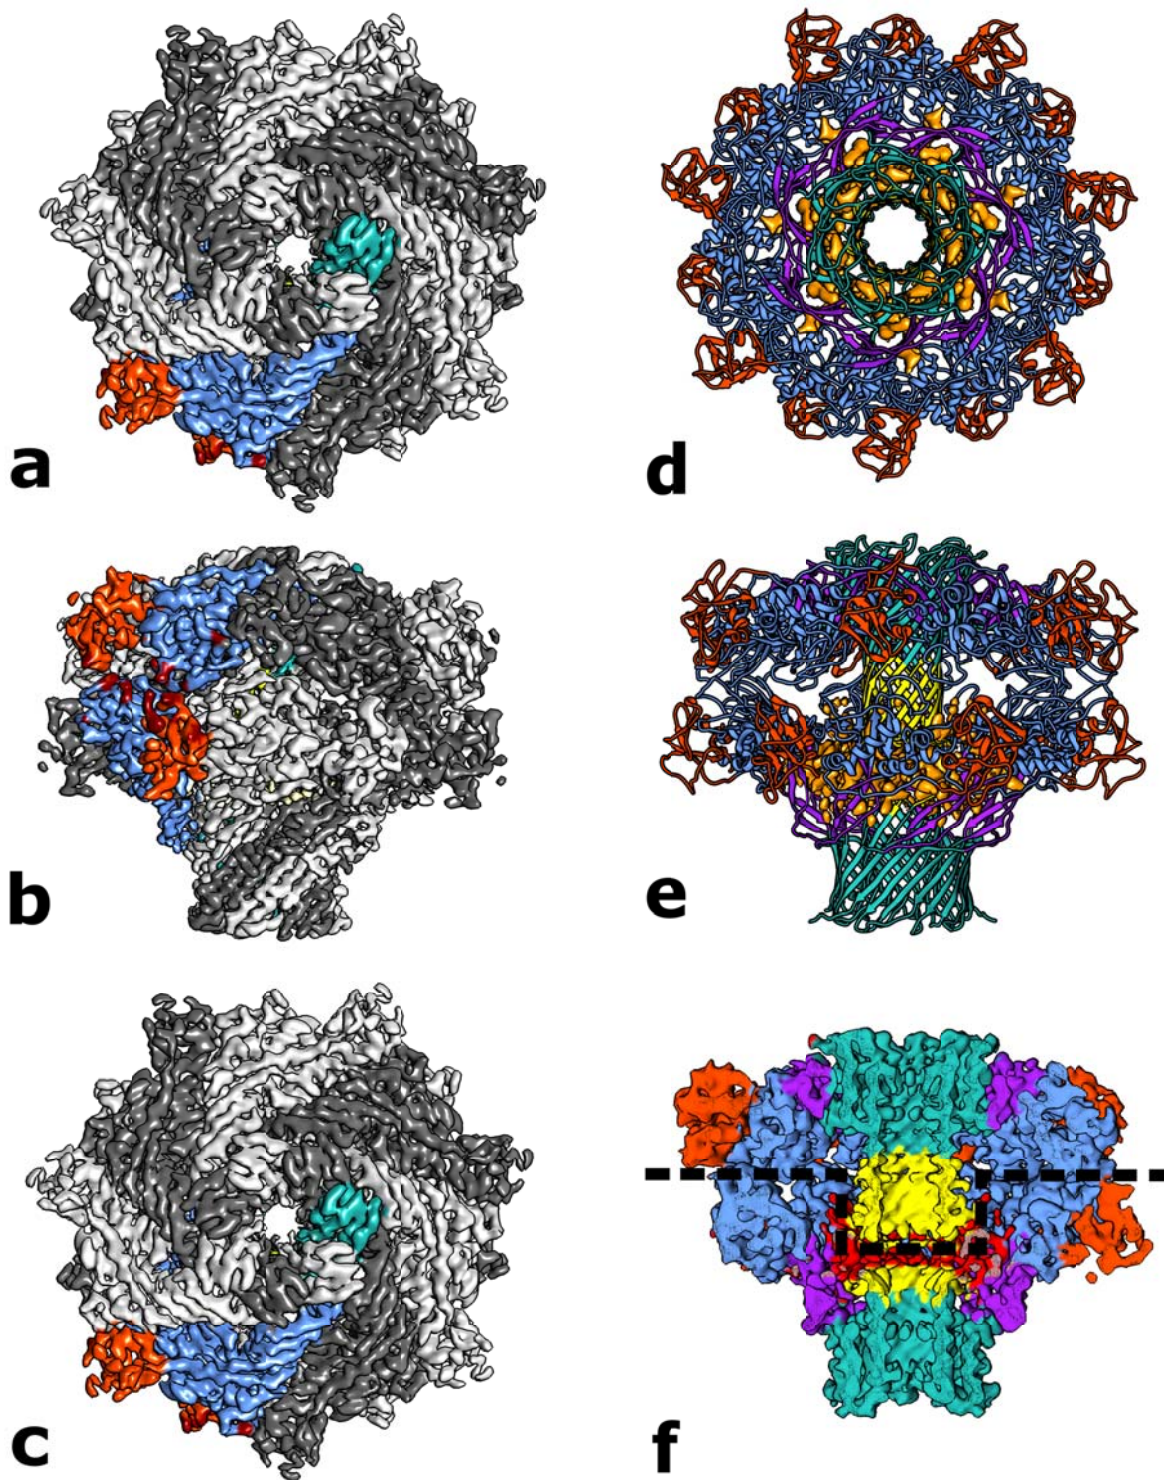

**Supplementary Figure 7: K246C/E258C mutant cryo-EM map and highlights**

K246C/E258C mutant cryo-EM map and highlights. **a**, Cryo-EM map top view (quasipore side) colour-coded as in Figure 1. **b**, Side view of the same map. **c**, Bottom view of the same map (post-prepore side). **d**, Top view of the fitted atomic model of the two aerolysin heptamers showing in addition in gold a low-resolution density that provides an approximate location for the flexible prestem loop. **e**, side view of the same atomic model. **f**, cut-through the cryo-EM map colour coded by domains as in 1a. Additionally low-resolution density of the prestem loop is shown in red. Dashed line separates the quasipore and post-prepore densities.

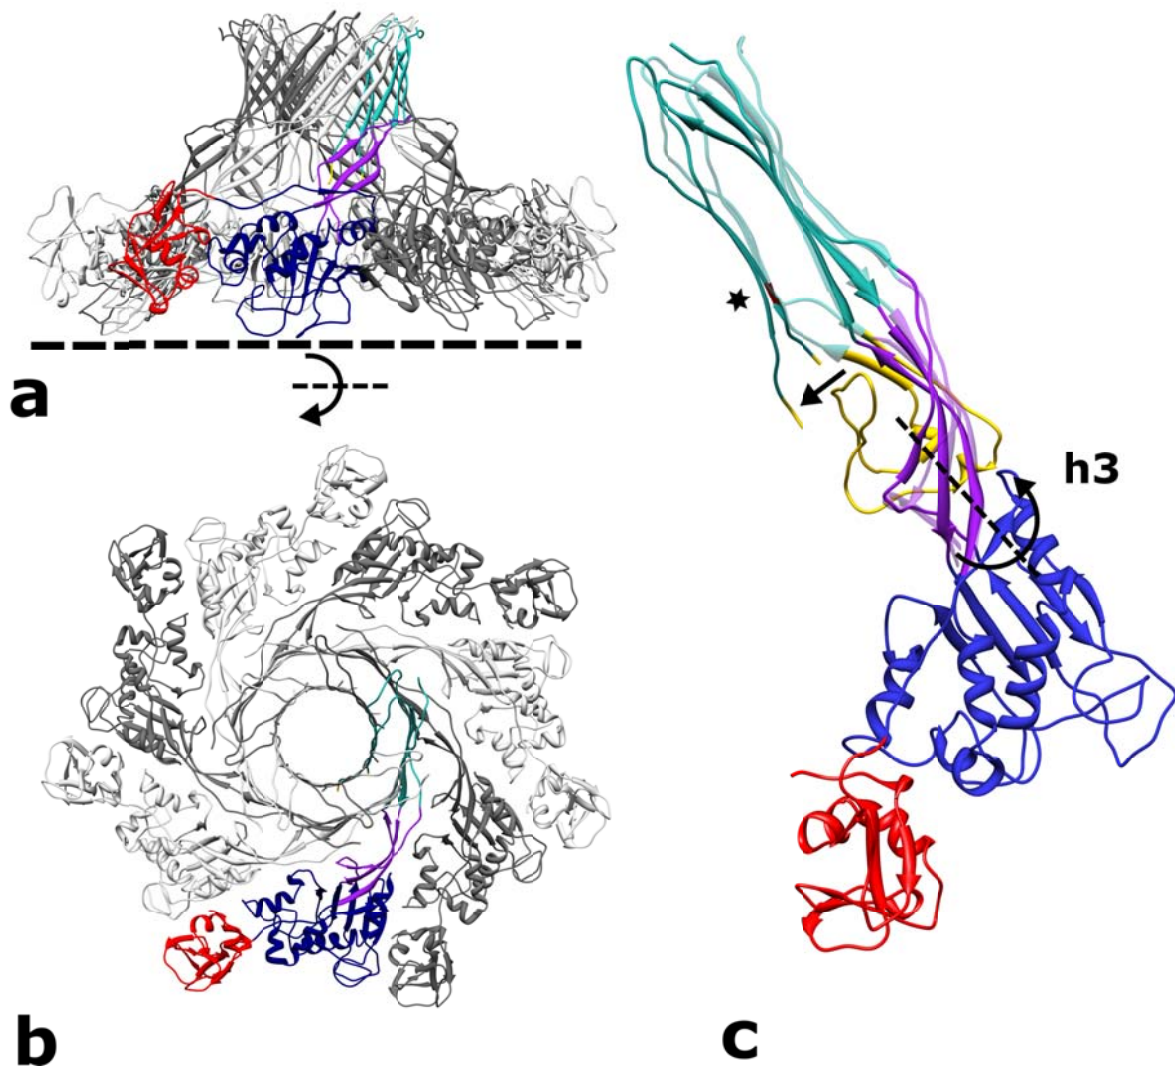

**Supplementary Figure 8: Post-prepore architecture**

Post-prepore architecture. **a**, Post-prepore heptamer structure side view coloured as Figure 1. Dashed line shows the position of the membrane. **b**, Post-prepore heptamer top view. **c**, Prepore to post-prepore transition. The prepore and post-prepore structures were aligned on domain 2. For clarity the prepore structure is shown semi-transparent whilst post-prepore is colour coded as in Figure 1. Domains 1 and 2 are shown for post-prepore only. The position of the Y221(G) residue is marked by a star whilst the main movement axis is shown (h3 – hinge 3). The movement of the prestem loop is shown by an arrow.

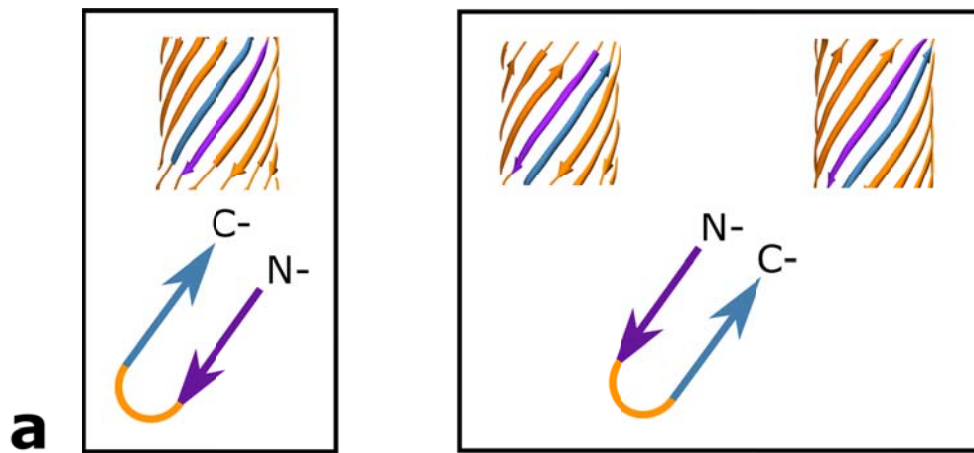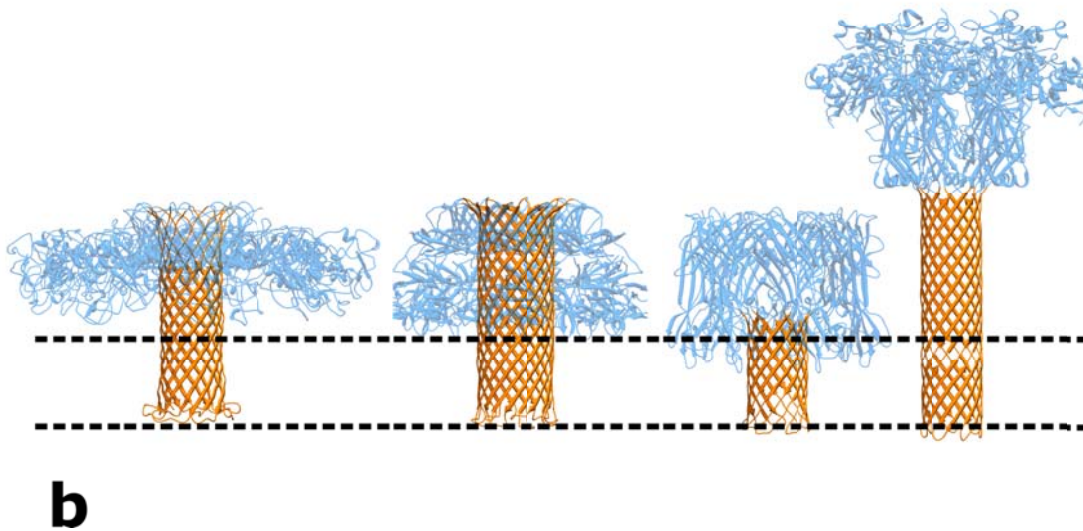

### Supplementary Figure 9: PFT comparisons and strand inversion

PFT comparisons and strand inversion. **a**, Pore  $\beta$ -barrels seen from the outside, with the extracellular side up. Strand inversion in the aerolysin  $\beta$ -barrel (left box) shows an atypical conformation in which the first strand to cross the membrane to the intracellular side is positioned on the right of the  $\beta$ -hairpin. In comparison (right box), strand disposition for anthrax protective antigen (left, PDB 3J9C) and  $\alpha$ -hemolysin (right, PDB 7AHL)  $\beta$ -barrels shows the typical left to right pattern. **b**, Comparison of the putative aerolysin fully deployed pore with other known PFT structures. From left to right, aerolysin (far left), lysenin (PDB 5GAQ), anthrax protective antigen (PDB 3J9C) and  $\alpha$ -hemolysin (PDB 7AHL - far right). The cap domain is shown in light blue with 50% transparency for clarity. The dashed lines delineate the membrane hydrophobic core. The length of aerolysin inner  $\beta$ -barrel matches the length of anthrax protective antigen  $\beta$ -barrel and that of lysenin  $\beta$ -barrel.



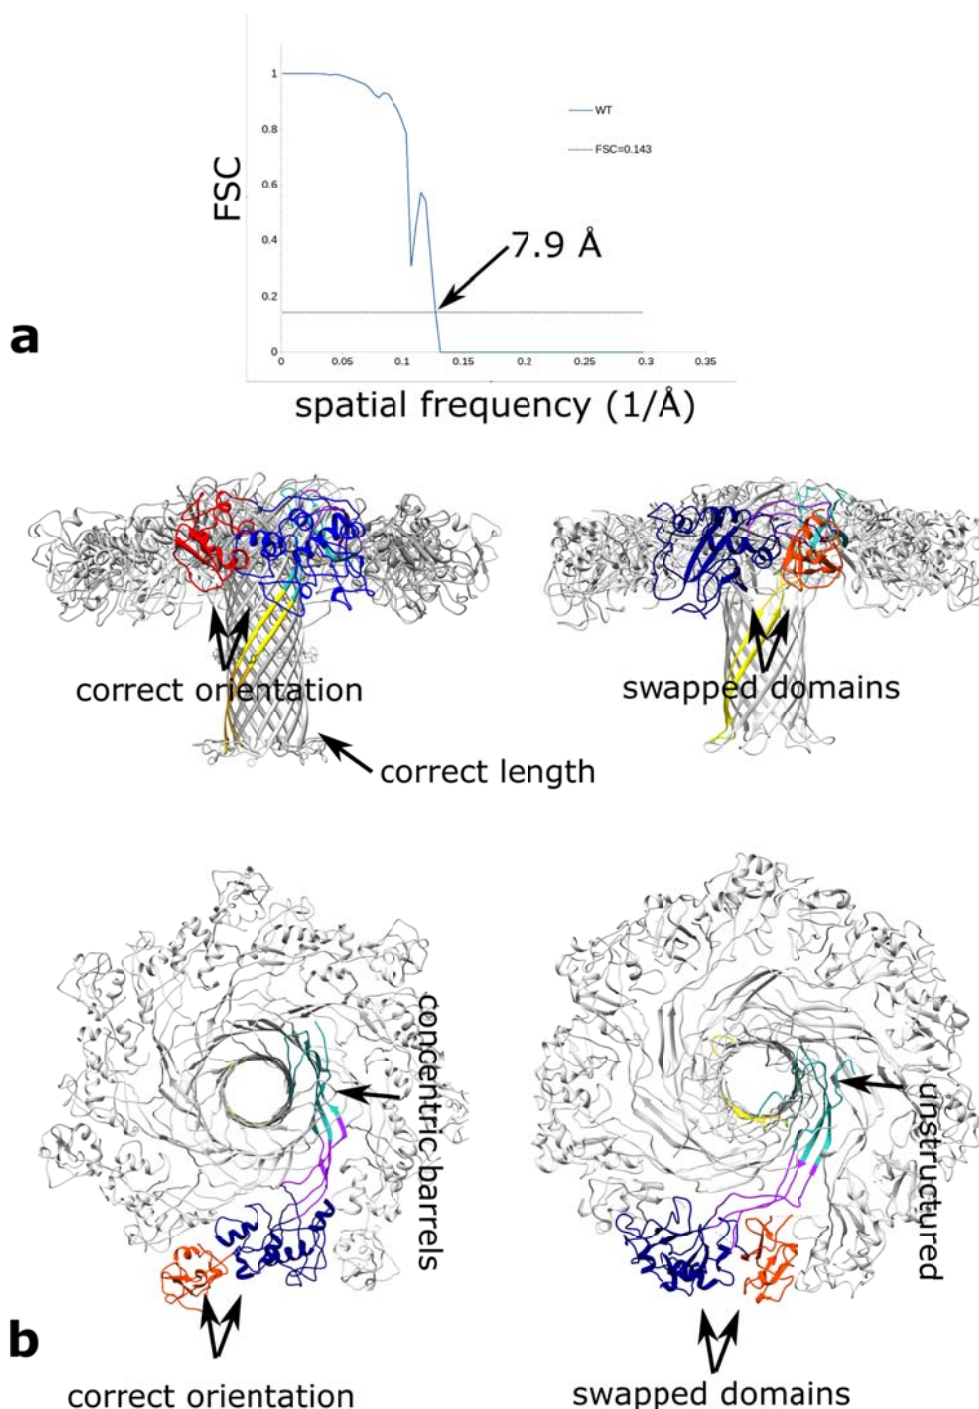

**Supplementary Figure 10: FSC of the WT map and comparison of the atomic resolution structure of aerolysin heptamers and the previously published aerolysin model**

FSC of the WT map and comparison between the atomic resolution structure of the aerolysin heptamers with the previously published aerolysin model<sup>3</sup>. **a**, gold standard FSC curve of the WT maps. The horizontal dashed line indicates the 0.143 cutoff used to estimate the global resolution of the map at 7.9 Å resolution.

**b**, Whilst the previous model predicted the large collapse involved in pore formation it was unable to solve key features shown in the current structure. In particular, the domains 1 and 2 of the protein were misplaced in the cap (arrows) whilst the length of the transmembrane  $\beta$ -barrel was underestimated. The concentric  $\beta$ -barrel fold (arrow – concentric barrels) was also missing from the previous model based on low resolution EM maps (arrow - unstructured).



### Supplementary Note 1: comparison with previous atomic models

We previously reported atomic models for the prepore, post-prepore and quasipore conformation, which were based on low-resolution ( $\sim 18$  Å) cryo-EM maps coupled to dynamic integrative modelling<sup>3</sup>. Although these initial models correctly highlighted the large collapse taking place between the post-prepore and the quasipore conformation, and revealed that it was due to profound rearrangements in domain 3 and 4, they missed to capture some important features disclosed by our new high-resolution structures (Sup. Fig. 10). First, it missed the existence of a double concentric  $\beta$ -barrel fold at the outside-facing mouth of the pore, of which the inner  $\beta$ -barrel develops to an 87-Å long  $\beta$ -barrel spanning the whole length of the pore. Second, domains 1 and 2 were swapped in the old models. Third, a  $\beta$ -barrel strands inversion at the inner  $\beta$ -barrel, which is the consequence of vast reorganization needed to form the double  $\beta$ -barrel fold, was not predicted.

### Supplementary References

- 1 Szczesny, P. *et al.* Extending the aerolysin family: from bacteria to vertebrates. *PLoS One* **6**, e20349 (2011).
- 2 Lesieur, C. *et al.* Increased stability upon heptamerization of the pore-forming toxin aerolysin. *J Biol Chem* **274**, 36722-36728 (1999).
- 3 Degiacomi, M. T. *et al.* Molecular assembly of the aerolysin pore reveals a swirling membrane-insertion mechanism. *Nat Chem Biol* **9**, 623-629 (2013).
